# Supplementary material for: Synergistic NiO/Fe2O3 heterostructure-enhanced electrocatalytic performance in dye-sensitized solar cells
Source: Royal Society of Chemistry journal article supplement (doi:10.1039/d3ce00298e), 2023-01-01
Supplement: d3ce00298e1.pdf [file d3ce00298e1.pdf]

**Synergistic NiO/Fe<sub>2</sub>O<sub>3</sub> heterostructure enhanced electrocatalytic performance in dye-sensitized solar cells**

Ying Meng<sup>a</sup>, Wen Wang<sup>b</sup>, Chunqiu Zhang<sup>a</sup>, Jixin Yao<sup>c</sup>, Changzheng Xie<sup>a</sup>, Zhenfa Zi<sup>a</sup>,  
Changcheng Lin<sup>b</sup>, Shibin Lu<sup>c,\*</sup>, Guang Li<sup>b\*</sup>

*<sup>a</sup>Key Laboratory for Photoelectric Detection Science and Technology of Education Department of Anhui Province, and School of Physics and Materials Engineering, Hefei Normal University, Hefei, Anhui 230601, China*

*<sup>b</sup>School of Materials Science and Engineering, Anhui University, Hefei, 230601, China*

*<sup>c</sup>Anhui Province Key Laboratory of Simulation and Design for Electronic Information System, and School of Electronic Information and Integrated Circuits, Hefei Normal University, Hefei, 230601, China*

\*e-mail address: (S. Lu) shibinlu@163.com; (G. Li) [liguang1971@ahu.edu.cn](mailto:liguang1971@ahu.edu.cn).

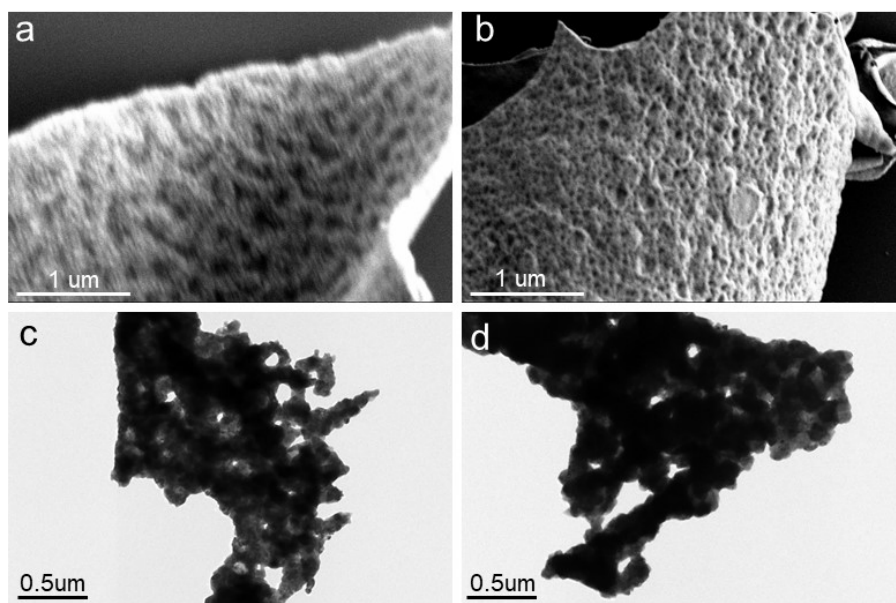

Fig.S(1a and 1b) The SEM images of NiO@NC and Fe<sub>2</sub>O<sub>3</sub>@NC. Fig.S (1c and 1d) the TEM images of NiO@NC and Fe<sub>2</sub>O<sub>3</sub>@NC

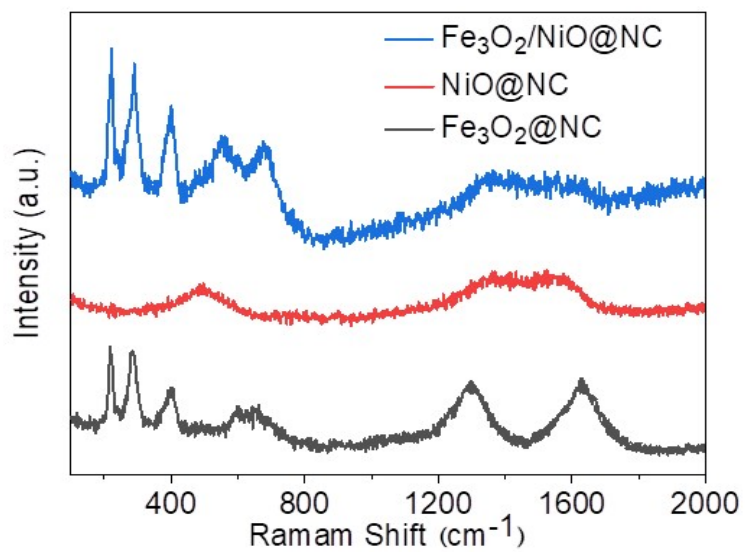

Fig.S2 the Raman of NiO@NC, Fe<sub>2</sub>O<sub>3</sub>@NC and NiO/Fe<sub>2</sub>O<sub>3</sub>@NC.

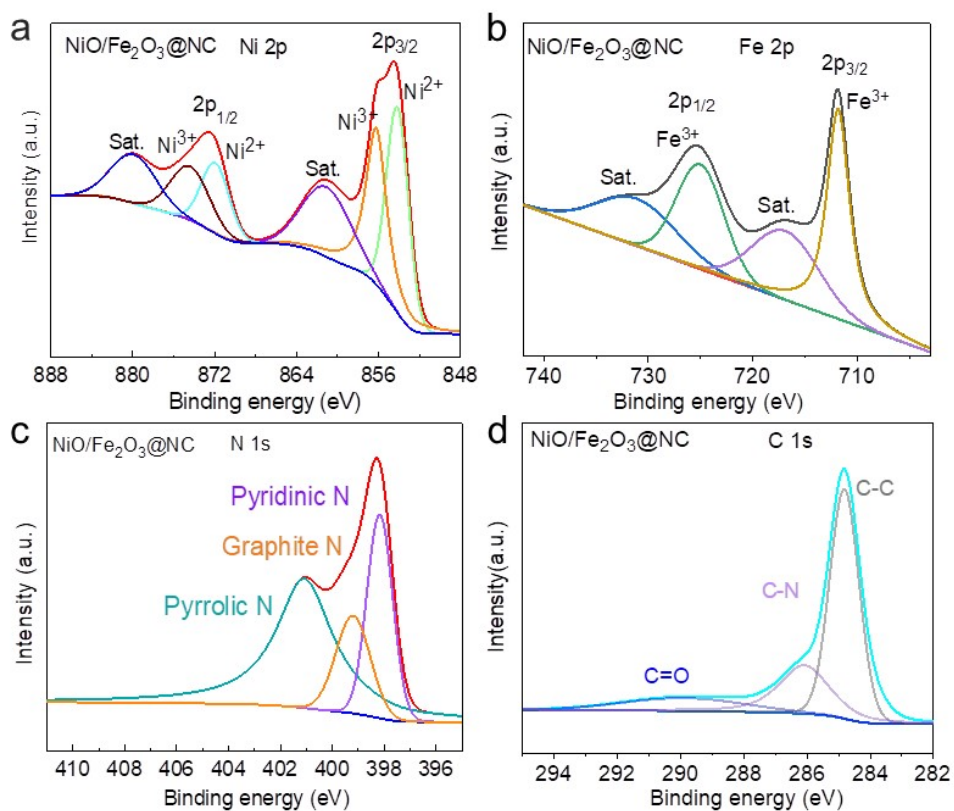

Fig.S3 (a) XPS spectra of Ni 2p for NiO/Fe<sub>2</sub>O<sub>3</sub>@NC. (b) XPS spectra of Fe 2p for NiO/Fe<sub>2</sub>O<sub>3</sub>@NC. (c) XPS spectra of N 1s for NiO/Fe<sub>2</sub>O<sub>3</sub>@NC. (d) XPS spectra of C 1s for NiO/Fe<sub>2</sub>O<sub>3</sub>@NC.
